# Supplementary material for: Small molecule drug screening in Drosophila identifies the 5HT2A receptor as a feeding modulation target
Source: PubMed Central journal article supplement — Sci Rep. 2013 Jul 2;3:srep02120. doi: 10.1038/srep02120 (PMC3698492; doi:10.1038/srep02120), 2013-07-02
Supplement: srep02120-s1.pdf [file srep02120-s1.pdf]

## COVER PAGE: Supplementary Table 1

### **Small molecule drug screening in *Drosophila* identifies the 5HT2A receptor as a feeding modulation target**

Gabriel Gasque<sup>1</sup>, Stephen Conway<sup>1</sup>, Juan Huang<sup>2</sup>, Yi Rao<sup>3</sup>, Leslie B. Vosshall<sup>1,4\*</sup>

<sup>1</sup>The Rockefeller University, 1230 York Avenue, Box 63, New York, NY 10065, U.S.A.

<sup>2</sup>School of Basic Medical Sciences, Nanjing Medical University, Nanjing 210029,  
People's Republic of China

<sup>3</sup>Peking-Tsinghua Center for Life Sciences at Peking University School of Life Sciences,  
Yiheyuan Road, Beijing 100871, People's Republic of China

<sup>4</sup>Howard Hughes Medical Institute

\*Correspondence to [Leslie.Vosshall@rockefeller.edu](mailto:Leslie.Vosshall@rockefeller.edu)

## Supplementary Table 1

| #                                                      | ID         | Compound name                             | % Relative Fluorescence |        |
|--------------------------------------------------------|------------|-------------------------------------------|-------------------------|--------|
|                                                        |            |                                           | Mean                    | S.E.M. |
| <b>Secondary screen positives: anorectic compounds</b> |            |                                           |                         |        |
| 1                                                      | RU-0000604 | Pararosaniline pamoate                    | -79.08                  | 0.36   |
| 2                                                      | RU-0001105 | Gossypol                                  | -65.72                  | 3.00   |
| 3                                                      | RU-0084477 | Nalbuphine hydrochloride                  | -65.59                  | 2.73   |
| 4                                                      | RU-0000160 | Gentian violet                            | -64.97                  | 4.26   |
| 5                                                      | RU-0083601 | Ivermectin                                | -63.61                  | 6.06   |
| 6                                                      | RU-0083693 | Avermectin B1                             | -61.65                  | 2.74   |
| 7                                                      | RU-0084376 | Ivermectin                                | -58.75                  | 4.11   |
| 8                                                      | RU-0001034 | Baicalein                                 | -56.94                  | 9.42   |
| 9                                                      | RU-0092499 | Verteporfin                               | -48.52                  | 2.28   |
| 10                                                     | RU-0001055 | Pristimerin                               | -47.29                  | 16.10  |
| 11                                                     | RU-0084237 | AC-93253 iodide                           | -42.33                  | 6.31   |
| 12                                                     | RU-0001069 | Purpurin                                  | -41.36                  | 6.61   |
| 13                                                     | RU-0023945 | Trichlorfon                               | -38.34                  | 7.03   |
| 14                                                     | RU-0001664 | Gossypetin                                | -32.19                  | 4.53   |
| 15                                                     | RU-0001979 | 3H-1,2,dithiole-3-thioneo                 | -31.37                  | 4.40   |
| 16                                                     | RU-0024012 | Antimycin A                               | -30.48                  | 14.47  |
| 17                                                     | RU-0001173 | Haematoxylin                              | -28.18                  | 5.02   |
| 18                                                     | RU-0001183 | Mundulone                                 | -26.41                  | 1.22   |
| 19                                                     | RU-0000948 | Gedunin                                   | -24.20                  | 2.14   |
| 20                                                     | RU-0001216 | Brazilein                                 | -21.45                  | 6.25   |
| 21                                                     | RU-0000777 | Fipronil                                  | -21.33                  | 4.19   |
| 22                                                     | RU-0001248 | Irigenol                                  | -20.27                  | 6.85   |
| 23                                                     | RU-0001029 | Quinalizarin                              | -18.17                  | 2.70   |
| 24                                                     | RU-0000820 | Reserpine                                 | -18.10                  | 5.00   |
| 25                                                     | RU-0000020 | Clemastine                                | -16.93                  | 5.22   |
| 26                                                     | RU-0001859 | Metitepine                                | -16.79                  | 4.65   |
| 27                                                     | RU-0000392 | Trifluoperazine                           | -15.80                  | 3.91   |
| 28                                                     | RU-0000871 | Sanguinarine                              | -15.14                  | 4.50   |
| 29                                                     | RU-0001972 | Plumbagin                                 | -13.85                  | 2.71   |
| 30                                                     | RU-0084743 | 3-Tropanylindole-3-carboxylate methiodide | -12.43                  | 9.45   |
| 31                                                     | RU-0000907 | Triflupromazine                           | -11.94                  | 4.51   |
| 32                                                     | RU-0000567 | Naltrexone                                | -11.41                  | 7.29   |

| #                                                        | ID         | Compound name                              | % Relative Fluorescence |        |
|----------------------------------------------------------|------------|--------------------------------------------|-------------------------|--------|
|                                                          |            |                                            | Mean                    | S.E.M. |
| <b>Secondary screen positives: orexiogenic compounds</b> |            |                                            |                         |        |
| 1                                                        | RU-0000088 | Erythromycin                               | 10.73                   | 11.53  |
| 2                                                        | RU-0000156 | Ergonovine                                 | 10.77                   | 5.23   |
| 3                                                        | RU-0000144 | Diphenhydramine                            | 12.27                   | 4.40   |
| 4                                                        | RU-0084008 | L-Aspartic acid                            | 12.62                   | 6.46   |
| 5                                                        | RU-0000325 | Xylometazoline                             | 13.01                   | 3.18   |
| 6                                                        | RU-0000066 | Carbamazepine                              | 14.92                   | 5.69   |
| 7                                                        | RU-0000058 | Chloroquine                                | 15.48                   | 6.42   |
| 8                                                        | RU-0084161 | (2S,1'S,2'S)-2-(carboxycyclopropyl)glycine | 17.73                   | 7.15   |
| 9                                                        | RU-0084128 | Phenytoin                                  | 21.00                   | 5.00   |
| 10                                                       | RU-0024312 | Isoetharine                                | 21.02                   | 12.97  |

| #  | ID         | Compound name                              | Reported activity                                      |
|----|------------|--------------------------------------------|--------------------------------------------------------|
| 1  | RU-0000066 | Carbamazepine                              | Sodium channel antagonist                              |
| 2  | RU-0000088 | Erythromycin                               | Antibacterial                                          |
| 3  | RU-0000144 | Diphenhydramine                            | H1 histamine receptor antagonist                       |
| 4  | RU-0000325 | Xylometazoline                             | Alpha-adrenoceptor agonist                             |
| 5  | RU-0000392 | Trifluoperazine                            | Calmodulin antagonist; dopamine receptor antagonist    |
| 6  | RU-0000567 | Naltrexone                                 | Opiod receptor antagonist                              |
| 7  | RU-0000820 | Reserpine                                  | Inhibits vesicular catecholamine and serotonin uptake. |
| 8  | RU-0001859 | Metitepine                                 | Serotonin receptor antagonist                          |
| 9  | RU-0001972 | Plumbagin                                  | Antifeedant                                            |
| 10 | RU-0024312 | Isoetharine                                | Beta-adrenoceptor agonist                              |
| 11 | RU-0084008 | L-Aspartic acid                            | Amino acid                                             |
| 12 | RU-0084128 | Phenytoin sodium                           | Stabilizes sodium channels in the inactive state.      |
| 13 | RU-0084161 | (2S,1'S,2'S)-2-(carboxycyclopropyl)glycine | Group II metabotropic glutamate receptor agonist       |
| 14 | RU-0084477 | Nalbuphine                                 | Opiod receptor agonist-antagonist                      |

source: <https://www.collaborativedrug.com/>
